# Supplementary material for: Identifying early decline of daily function and its association with physical function in chronic kidney disease: performance-based and self-reported measures
Source: PeerJ journal article supplement (doi:10.7717/peerj.5286), 2018-07-18
Supplement: Evaluation_tool_in_English.pdf [file Evaluation_tool_in_English.pdf]

## Lawton IADL Scale

| Item and description                                                                                                                                                                                                                                                                                                                                                                                                                                                                                                               | <u>score</u> |
|------------------------------------------------------------------------------------------------------------------------------------------------------------------------------------------------------------------------------------------------------------------------------------------------------------------------------------------------------------------------------------------------------------------------------------------------------------------------------------------------------------------------------------|--------------|
| <b>1. Shopping</b><br><input type="checkbox"/> Takes care of all shopping needs independently.....3<br><input type="checkbox"/> Shops independently for small purchases .....2<br><input type="checkbox"/> Needs to be accompanied on any shopping trip .....1<br><input type="checkbox"/> Completely unable to shop .....0                                                                                                                                                                                                        |              |
| <b>2. Using public transportation</b><br><input type="checkbox"/> Travels independently on public transportation or drives own car .....4<br><input type="checkbox"/> Arranges own travel via taxi, but does not otherwise use public transportation.....3<br><input type="checkbox"/> Travels on public transportation when assisted or accompanied by another.....2<br><input type="checkbox"/> Travel limited to taxi or automobile with assistance of another .....1<br><input type="checkbox"/> Does not travel at all .....0 |              |
| <b>3. Food preparation</b><br><input type="checkbox"/> Plans, prepares, and serves adequate meals independently.....3<br><input type="checkbox"/> Prepares adequate meals if supplied with ingredients.....2<br><input type="checkbox"/> Heats and serves prepared meals or prepares meals but does not maintain adequate diet .....1<br><input type="checkbox"/> Needs to have meals prepared and served .....0                                                                                                                   |              |
| <b>4. Housekeeping</b><br><input type="checkbox"/> Maintains house alone with occasion assistance (heavy work).....4<br><input type="checkbox"/> Performs light daily tasks such as dishwashing, bed making .....3<br><input type="checkbox"/> Performs light daily tasks, but cannot maintain acceptable level of cleanliness .....2<br><input type="checkbox"/> Needs help with all home maintenance tasks .....1<br><input type="checkbox"/> Does not participate in any housekeeping tasks.....0                               |              |
| <b>5. Washing laundry</b><br><input type="checkbox"/> Does personal laundry completely.....2<br><input type="checkbox"/> Launders small items, rinses socks, stockings, etc .....1<br><input type="checkbox"/> All laundry must be done by others .....0                                                                                                                                                                                                                                                                           |              |
| <b>6. Using the telephone</b><br><input type="checkbox"/> Operates telephone on own initiative; looks up and dials numbers.....3<br><input type="checkbox"/> Dials a few well-known numbers.....2<br><input type="checkbox"/> Answers telephone, but does not dial.....1<br><input type="checkbox"/> Does not use telephone at all.....0                                                                                                                                                                                           |              |
| <b>7. Taking medicine</b><br><input type="checkbox"/> Is responsible for taking medication in correct dosages at correct time .....2<br><input type="checkbox"/> Takes responsibility if medication is prepared in advance in separate dosages.....1<br><input type="checkbox"/> Is not capable of dispensing own medication.....0                                                                                                                                                                                                 |              |

**8. Managing finances**

- Manages financial matters independently (budgets, writes checks, pays rent and bills, goes to bank); collects and keeps track of income .....2
- Manages day-to-day purchases, but needs help with banking, major purchases, etc .....1
- Incapable of handling money .....0

**Total score**

### Barthel Index

| Item                 | Score & Description                                                                                                                                                                   |
|----------------------|---------------------------------------------------------------------------------------------------------------------------------------------------------------------------------------|
| <b>1. Feeding</b>    | 0 = unable<br>5 = needs help cutting, spreading butter, etc.<br>10 = independent (food provided within reach)                                                                         |
| <b>2. Grooming</b>   | 0 = needs help with personal care<br>5 = independent face/hair/teeth/shaving (implements provided)                                                                                    |
| <b>3. Toilet use</b> | 0 = dependent<br>5 = needs some help, but can do something alone<br>10 = independent (on and off, dressing, wiping)                                                                   |
| <b>4. Bathing</b>    | 0 = dependent<br>5 = independent (or in shower)                                                                                                                                       |
| <b>5. Dressing</b>   | 0 = dependent<br>5 = needs help, but can do about half unaided<br>10 = independent (including buttons, zips, laces, etc.)                                                             |
| <b>6. Bowels</b>     | 0 = incontinent (or needs to be given enemata)<br>5 = occasional accident (once/week)<br>10 = continent                                                                               |
| <b>7. Bladder</b>    | 0 = incontinent, or catheterized and unable to manage<br>5 = occasional accident (max. once per 24 hours)<br>10 = continent (for over 7 days)                                         |
| <b>8. Mobility</b>   | 0 = immobile<br>5 = wheelchair independent, including corners, etc.<br>10 = walks with help of one person (verbal or physical)<br>15 = independent (but may use any aid, e.g., stick) |
| <b>9. Stairs</b>     | 0 = unable<br>5 = needs help (verbal, physical, carrying aid)<br>10 = independent up and down                                                                                         |
| <b>10. Transfer</b>  | 0 = unable – no sitting balance<br>5 = major help (one or two people, physical), can sit<br>10 = minor help (verbal or physical)<br>15 = independent                                  |
| <b>Total score</b>   |                                                                                                                                                                                       |

### TPIADL form

| Task                                                                                           | Time               | Score                                                                                                                                                                                                                                                                                                                  |
|------------------------------------------------------------------------------------------------|--------------------|------------------------------------------------------------------------------------------------------------------------------------------------------------------------------------------------------------------------------------------------------------------------------------------------------------------------|
| 1. <b>Pictorial-based communication task:</b> finding telephone numbers                        |                    | <input type="checkbox"/> (1) completed without error and within 30 seconds<br><input type="checkbox"/> (2) erroneous response within the time limit but corrected after a verbal cue<br><input type="checkbox"/> (3) not completed with errors within the time limit and unable to correct even following a verbal cue |
| 2. <b>Finance task:</b> finding and counting coins                                             |                    | <input type="checkbox"/> (1) completed without error and within 30 seconds<br><input type="checkbox"/> (2) erroneous response within the time limit but corrected after a verbal cue<br><input type="checkbox"/> (3) not completed with errors within the time limit and unable to correct even following a verbal cue |
| 3. <b>Cooking task :</b> finding and reading the ingredients present in food stimulants        |                    | <input type="checkbox"/> (1) completed without error and within 30 seconds<br><input type="checkbox"/> (2) erroneous response within the time limit but corrected after a verbal cue<br><input type="checkbox"/> (3) not completed with errors within the time limit and unable to correct even following a verbal cue |
| 4. <b>Shopping task:</b> finding two specified food items in an array of food items on a shelf |                    | <input type="checkbox"/> (1) completed without error and within 30 seconds<br><input type="checkbox"/> (2) erroneous response within the time limit but corrected after a verbal cue<br><input type="checkbox"/> (3) not completed with errors within the time limit and unable to correct even following a verbal cue |
| 5. <b>Pictorial-based medicine use task:</b> reading the directions on a medicine container    |                    | <input type="checkbox"/> (1) completed without error and within 30 seconds<br><input type="checkbox"/> (2) erroneous response within the time limit but corrected after a verbal cue<br><input type="checkbox"/> (3) not completed with errors within the time limit and unable to correct even following a verbal cue |
|                                                                                                | <b>Total score</b> |                                                                                                                                                                                                                                                                                                                        |
